# Supplementary material
Source: Oxford University Press journal article supplement (https://cob.silverchair-cdn.com/cob/content_public/journal/dev/issue/89/supplement/7/toc_develop-89-supplement.pdf)
Supplement: Supplementary file 1 [file toc_develop-89-supplement.pdf]

# Contents

|                                                                                                                                                                                   |         |
|-----------------------------------------------------------------------------------------------------------------------------------------------------------------------------------|---------|
| SLACK, J. M. W. Introduction                                                                                                                                                      | (i)     |
| <i>1. Structure and properties of the oocyte and egg</i>                                                                                                                          |         |
| WYLIE, C. C., BROWN, D., GODSAVE, S. F., QUARMBY, J. and HEASMAN, J. The cytoskeleton of <i>Xenopus</i> oocytes and its role in development                                       | 1–15    |
| HAUSEN, P., WANG, Y. H., DREYER, C. and STICK, R. Distribution of nuclear proteins during maturation of the <i>Xenopus</i> oocyte                                                 | 17–34   |
| TAYLOR, M. A., ROBINSON, K. R. and SMITH, L. D. Intracellular pH and ribosomal protein S6 phosphorylation: role in translational control in <i>Xenopus</i> oocytes                | 35–52   |
| MALACINSKI, G. M. and BARONE, D. Towards understanding paternal extragenic contributions to early amphibian pattern specification: the axolotl <i>ts-1</i> gene as a model system | 53–68   |
| <i>2. The relationship between egg cytoarchitecture and later pattern formation</i>                                                                                               |         |
| COOKE, J. The system specifying body position in the early development of <i>Xenopus</i> , and its response to early perturbations                                                | 69–87   |
| GIMLICH, R. L. Cytoplasmic localization and chordamesoderm induction in the frog embryo                                                                                           | 89–111  |
| <i>3. Analysis of developmental commitment using region and stage specific markers</i>                                                                                            |         |
| DAWID, I. B., HAYNES, S. R., JAMRICH, M., JONAS, E., MIYATANI, S., SARGENT, T. D. and WINKLES, J. A. Gene expression in <i>Xenopus</i> embryogenesis                              | 113–124 |
| GURDON, J. B., MOHUN, T. J., BRENNAN, S. and CASCIO, S. Actin genes in <i>Xenopus</i> and their developmental control                                                             | 125–136 |
| SLACK, J. M. W., CLEINE, J. H. and SMITH, J. C. Regional specificity of glycoconjugates in <i>Xenopus</i> and axolotl embryos                                                     | 137–153 |
| JONES, E. A. Epidermal development in <i>Xenopus laevis</i> : the definition of a monoclonal antibody to an epidermal marker                                                      | 155–166 |
| DUPRAT, A. M., KAN, P., GUALANDRIS, L., FOULQUIER, F., MARTY, J. and WEBER, M. Neural induction: embryonic determination elicits full expression of specific neuronal traits      | 167–183 |
| <i>4. Morphogenetic movements of gastrulation and neurulation</i>                                                                                                                 |         |
| KELLER, R. E., DANILCHIK, M., GIMLICH, R. and SHIH, J. The function and mechanism of convergent extension during gastrulation of <i>Xenopus laevis</i>                            | 185–209 |
| BOUCAUT, J. C., DARRIBERE, T., LI, S. D., BOULEKBACHE, H., YAMADA, K. M. and THIERY, J. P. Evidence for the role of fibronectin in amphibian gastrulation                         | 211–227 |
| GORDON, R. A review of the theories of vertebrate neurulation and their relationship to the mechanics of neural tube birth defects                                                | 229–255 |
| <i>5. The cell cycle and the temporal control of development</i>                                                                                                                  |         |
| SATOH, N. Recent advances in our understanding of the temporal control of early embryonic development in amphibians                                                               | 257–270 |
| FORD, C. C. Maturation promoting factor and cell cycle regulation                                                                                                                 | 271–284 |
| LASKEY, R. A. Chromosome replication in early development of <i>Xenopus laevis</i>                                                                                                | 285–296 |

## Contents

### 6. *Developmental commitment at the single cell level*

- HEASMAN, J., SNAPE, A., SMITH, J. C. and WYLIE, C. C. Single cell analysis of commitment in early embryogenesis 297–316

### 7. *Embryonic induction: phenomena and mechanisms*

- SMITH, J. C., DALE, L. and SLACK, J. M. W. Cell lineage labels and region-specific markers in the analysis of inductive interactions 317–331
- NIEUWKOOP, P. D. Inductive interactions in early amphibian development and their general nature 333–347
- GRUNZ, H. Information transfer during embryonic induction in amphibians 349–363
- WARNER, A. E. The role of gap junctions in amphibian development 365–380

8. *Index of authors and titles* 381–382

9. *Subject index* 383–388
